# Supplementary material for: Gynodioecy in the common spindle tree ( Euonymus europaeus L.) involves differences in the asymmetry of corolla shapes between sexually differentiated flowers
Source: PeerJ journal article supplement (doi:10.7717/peerj.8571), 2020-02-14
Supplement: Fig_S1.pdf [file Fig_S1.pdf]

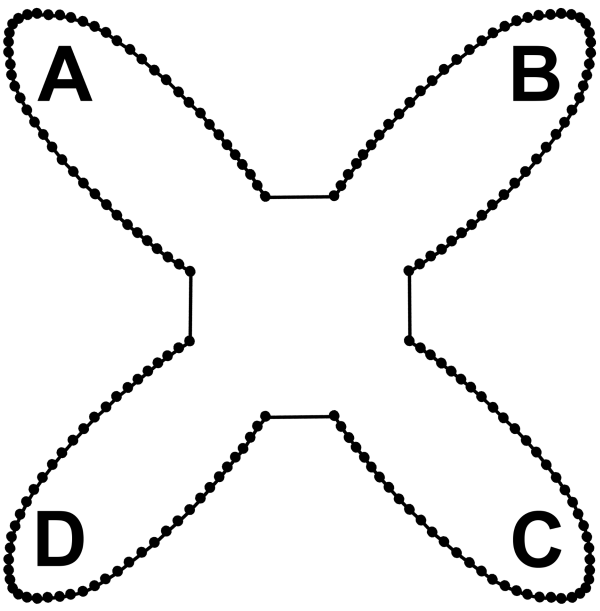

**(A)**

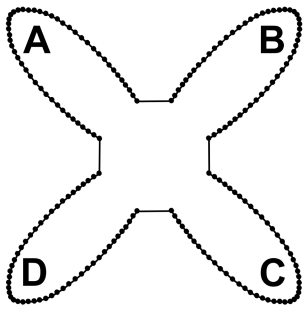

**identity**

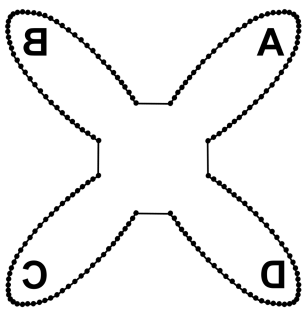

**reflection across vertical axis**

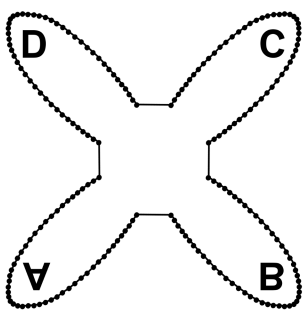

**reflection across horizontal axis**

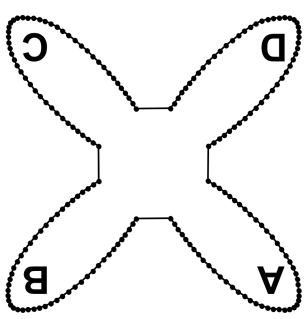

**reflection across both axes**

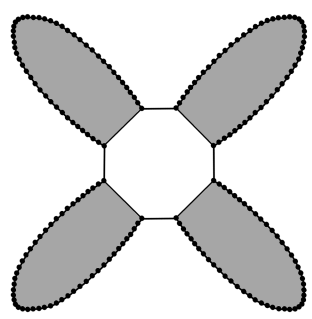

**symmetric variation**

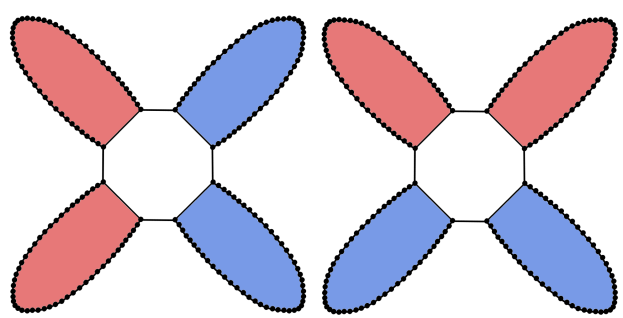

**lateral asymmetry**

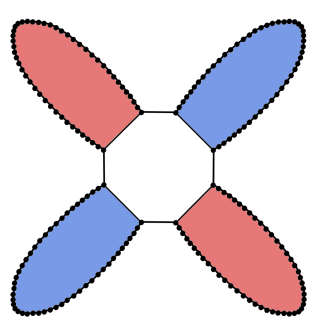

**transversal asymmetry**

**(B)**
